# Supplementary material for: Protein–protein HADDocking using exclusively pseudocontact shifts
Source: PubMed Central journal article supplement — J Biomol NMR. 2011 May 29;50(3):263–6. doi: 10.1007/s10858-011-9514-4 (PMC3133697; doi:10.1007/s10858-011-9514-4), 2011-05-29
Supplement: 10858_2011_9514_MOESM1_ESM.pdf [file 10858_2011_9514_MOESM1_ESM.pdf]

## SUPPORTING INFORMATION

# Protein-Protein HADDOCK using exclusively Pseudocontact Shifts

*Christophe Schmitz and Alexandre M. J. J. Bonvin*

Bijvoet Center for Biomolecular Research, Science Faculty, Utrecht University, Padualaan 8, 3584 CH Utrecht, The Netherlands.

E-mail: a.m.j.j.bonvin@uu.nl

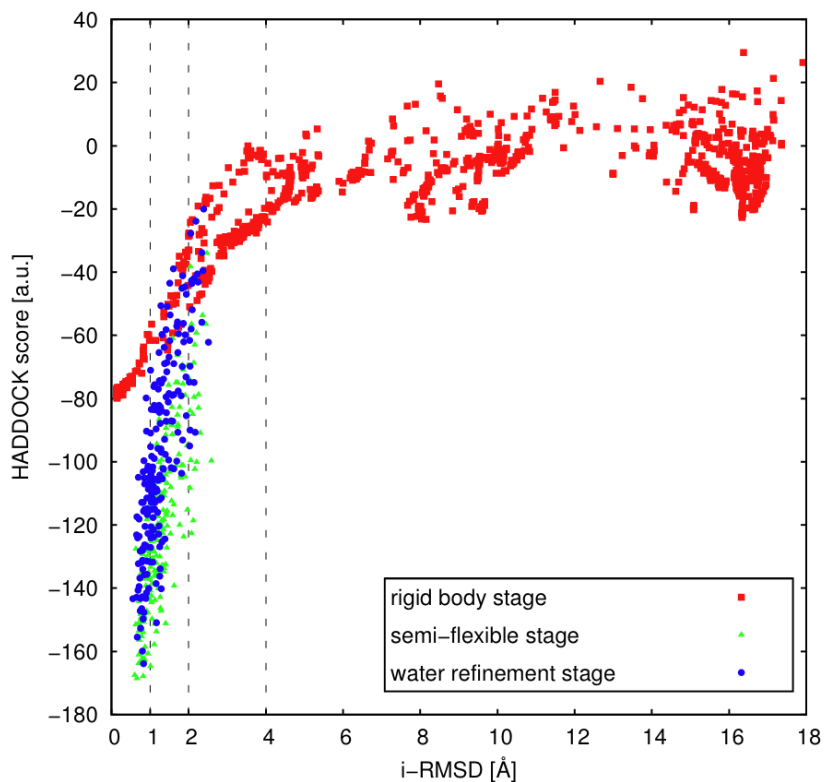

**SI Fig. 1**  $\epsilon$ 186/HOT interface RMSD (i-RMSD) for the intermediate and final results of the bound-bound HADDOCK calculation. The level of noise used for the synthetic data was  $\pm 0.45$  ppm. In Figure 1 the level of noise used was  $\pm 0.15$  ppm.

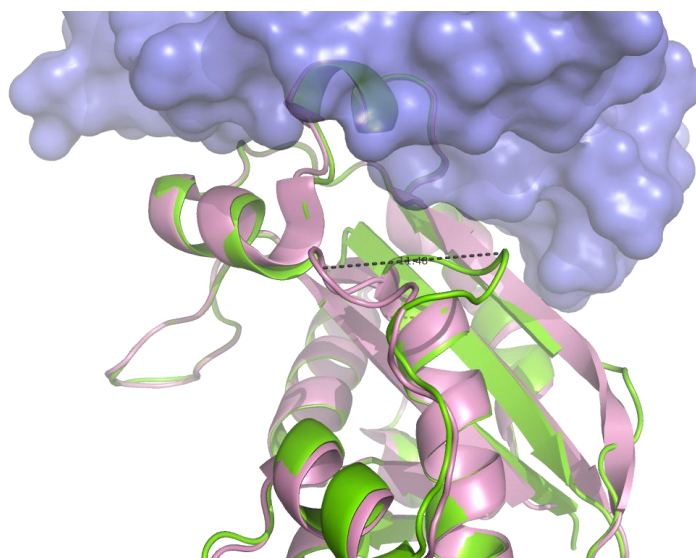

**SI Fig. 2** Conformational changes of  $\epsilon 186$  localized at the loop 157K-162G. In pink the structure of bound  $\epsilon 186$  (2IDO chain C). In green the superimposed crystal structure of free  $\epsilon 186$  (1J53). In blue the surface of HOT (2IDO chain D). The loop 157K-162G undergoes a large conformational change of up to 11.5 Å.

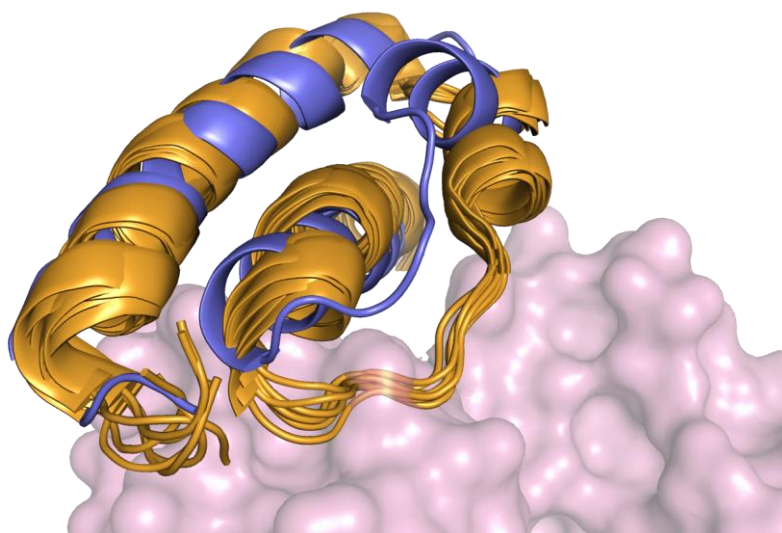

**SI Fig. 3** Conformational changes of HOT. In blue, ribbon representation of bound HOT (2IDO, chain D). In orange, ribbon representation of free HOT (2AXD). In pink, the surface of bound  $\epsilon 186$  (2IDO chain C).

**SI Table 1** Axial and Rhombic component values used during the docking<sup>a</sup>

|                     | Synthetic PCS <sup>b</sup> |                  |                  | Experimental PCS <sup>c</sup> |                  |                  |
|---------------------|----------------------------|------------------|------------------|-------------------------------|------------------|------------------|
|                     | Dy <sup>3+</sup>           | Er <sup>3+</sup> | Tb <sup>3+</sup> | Dy <sup>3+</sup>              | Er <sup>3+</sup> | Tb <sup>3+</sup> |
| $\Delta\chi_{ax}^d$ | 10670.0                    | -2705.4          | 7282.4           | 10622.0                       | -2700.9          | 7275.0           |
| $\Delta\chi_{rh}^d$ | 1252.8                     | -1130.8          | 1491.0           | 1254.9                        | -1184.9          | 1554.7           |

<sup>a</sup> Obtained by fitting the PCS values against  $\epsilon 186$  with the software Numbat

<sup>b</sup> The synthetic PCS generated with a level of noise of  $\pm 0.15$  ppm are fitted against the bound form of  $\epsilon 186$

<sup>c</sup> The experimental PCS are fitted against the unbound form of  $\epsilon 186$

<sup>d</sup> In units of  $10^{-28}/12/\pi \text{ m}^3$
